# Supplementary material for: Succinimido–Ferrocidiphenol Complexed with Cyclodextrins Inhibits Glioblastoma Tumor Growth In Vitro and In Vivo without Noticeable Adverse Toxicity
Source: MDPI journal article supplement (doi:10.3390/molecules27144651), 2022-07-21

Supplementary Figure S1

Representative histopathology images of kidneys (panels A-B) and liver (panels C-D) obtained from rats used for the *in vivo* evaluation of SuccFerr:RAME $\beta$ CD anticancer activity in a murine glioblastoma model, and treated during 10 days with i.v. injections of SuccFerr:RAME $\beta$ CD (1 mg/kg). A qualified senior pathologist (N.S.) did not observe any sign of toxicity in the kidneys and the livers of the animals treated by SuccFerr:RAME $\beta$ CD, when compared to the control group.

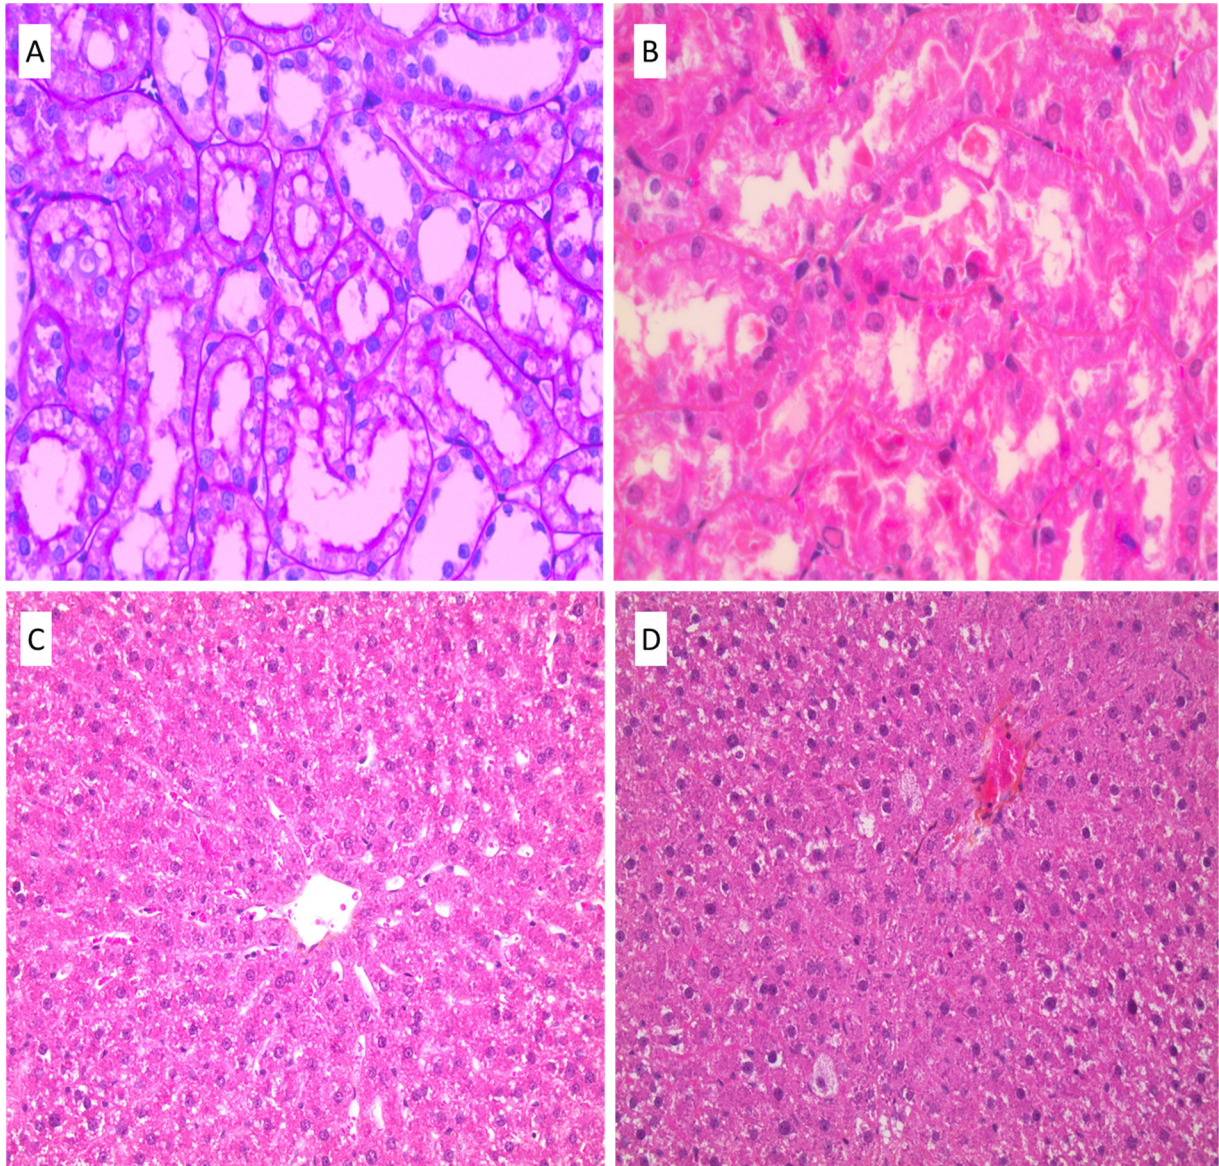

Supplement: s1 [file s1]
